# Supplementary material
Source: Hindawi journal article supplement (doi:10.1155/2011/934265)
Supplement: f1 [file 934265.f1.doc]

A short description for Supplementary Table 1:

Among all studies published in Chinese language of this meta-analysis, we summarized their study objectives and the main results for 869T/C polymorphism. In detail, transforming growth factor-beta 1 gene 869T/C polymorphism was genotyped in Chinese populations. The genotype and allele frequencies of this polymorphism was listed and the odds of developing hypertension for the 869C allele (869CC genotype) carriers was documented with regard to those with the 869T allele (869TT genotype).

***Supplementary Table 1.*** Summarization of five Chinese language publications qualified in this meta-analysis

| **Author & Reference** | **Study Objective** | **Main Results for 869T/C Polymorphism** |
| --- | --- | --- |
| Wei YS et al.19 | To study the relationship of polymorphisms of transforming growth factor-beta 1 gene 869T/C and 915G/C in the exon 1 with essential hypertension in population of Chinese Zhuang nationality. | The 869T/C polymorphism was significantly different between patients with essential hypertension and healthy controls. The relative risk of suffering from essential hypertension of 869T allele was 1.525 times that of 869C allele (95% CI: 1.133-2.053). The systolic blood pressure levels of 869C allele carriers was significantly higher than that in non-carriers (22.0±3.9 kPa versus 21.1±3.1 kPa, P<0.05). |
| Hu BC et al.20 | To study the association of three polymorphisms including transforming growth factor-beta 1 gene +869T/C, aldosterone synthase gene -344T/C, and alpha-adducin gene 460Gly/Trp with essential hypertension in Chinese Han population. | For female, there was significant difference in genotype distribution and allele frequency of 869T/C polymorphism (P<0.02), as compared with subjects with 869T allele. The 869CC homozygosity had a higher relative risk of hypertension (OR=2.97; 95% CI: 1.38-6.32; P=0.004), whereas we failed to detect any association between 869T/C polymorphism and essential hypertension in male. |
| Zhang QY et al.21 | To study the relationship of transforming growth factor-beta 1 gene 869T/C and 915G/C polymorphisms and its plasma levels with hypertension and left ventricular hypertrophy in Chinese. | Significant genotype distributions of 869T/C polymorphism was identified between hypertensive patients free of left ventricular hypertrophy and healthy controls (P<0.01). Plasma transforming growth factor-beta 1 levels also differed significantly between hypertensive patients free of left ventricular hypertrophy and healthy controls (P<0.05). |
| Wei CL et al.22 | To study the relationship of transforming growth factor-beta 1 gene 869T/C and 915G/C polymorphisms with essential hypertension in Chinese. | The genotype distribution and allele frequency of 869T/C polymorphism differed significantly between patients with essential hypertension and healthy controls (P<0.05). The 869C allele carriers had 1.628 times more likely to develop essential hypertension relative to those with 869T allele (95% CI: 1.143-2.319). The systolic blood pressure levels of 869C allele carriers was significantly higher than that in non-carriers (162.4±18.3 mmHg versus 156.1±16.9 mmHg, P<0.05). |
| Zhang ZD et al.23 | To explore the association of genetic polymorphism (869T/C) of transforming growth factor-beta 1 in patients with atrial fibrillation and essential hypertension. | The frequencies of 869CC genotype and 869C allele for the essential hypertension with atrial fibrillation group were significantly higher than those of essential hypertension without atrial fibrillation group and the control group (P<0.05). The relative risk suffered from essential hypertension with atrial fibrillation of 869C allele was 2.044 times of the 869T allele (95% CI: 1.157-3.612). |

***Abbreviations:*** OR, odds ratio; 95% CI, 95% confidence interval.
